# Supplementary material for: Patagonian sheepdog: Genomic analyses trace the footprints of extinct UK herding dogs to South America
Source: PLoS Genet. 2022 Apr 28;18(4):e1010160. doi: 10.1371/journal.pgen.1010160 (PMC9049511; doi:10.1371/journal.pgen.1010160)
Supplement: S7 Table — Haplotypes shared between each pair of herding breeds, considering the 13 homogenous PGOD. (XLSX) [file pgen.1010160.s007.xlsx]

## Sheet: Hoja1
S7 Table. Estimated date of herding breed divergence. Haplotypes shared between each pair of herding breeds, considering the 13 homogenous PGODs.
Breed 1	Breed 2	Haplotype Sharing	Estimated Years Ago	Predicted Year
Australian shepherd (AUSS)	old English sheepdog (OES)	53159135.3	166	1853
	Patagonian sheepdog (PGOD)	56931939.3	165	1854
	German shepherd dog (GSD)	71031907.8	164	1855
	Australian kelpie (KELP)	71613291.1	164	1855
	Bearded collie (BERD)	83271527.5	162	1857
	Cardigan welsh corgi (CARD)	84138551.5	162	1857
	Pembroke welsh corgi (PEMB)	85288294.1	162	1857
	Border collie (BORD)	105473603	160	1859
	Shetland sheepdog (SSHP)	185941011	151	1868
	Collie (COLL)	324778418	135	1884
Bearded collie (BERD)	German shepherd dog (GSD)	11613091.3	170	1849
	Australian shepherd (AUSS)	83271527.5	162	1857
	Pembroke welsh corgi (PEMB)	110720177	159	1860
	Cardigan welsh corgi (CARD)	110846366	159	1860
	Patagonian sheepdog (PGOD)	138772292	156	1863
	old English sheepdog (OES)	138775523	156	1863
	Australian kelpie (KELP)	141368975	156	1863
	Shetland sheepdog (SSHP)	158356573	154	1865
	Collie (COLL)	229517653	146	1873
	Border collie (BORD)	303411395	137	1882
Border collie (BORD)	German shepherd dog (GSD)	34355516.8	168	1851
	old English sheepdog (OES)	87007506.8	162	1857
	Cardigan welsh corgi (CARD)	101721388	160	1859
	Pembroke welsh corgi (PEMB)	102678499	160	1859
	Australian shepherd (AUSS)	105473603	160	1859
	Shetland sheepdog (SSHP)	137763291	156	1863
	Collie (COLL)	172357122	152	1867
	Patagonian sheepdog (PGOD)	199211871	149	1870
	Bearded collie (BERD)	303411395	137	1882
	Australian kelpie (KELP)	334087512	134	1885
Cardigan welsh corgi (CARD)	German shepherd dog (GSD)	15987253.2	170	1849
	old English sheepdog (OES)	47374361.5	166	1853
	Patagonian sheepdog (PGOD)	70724179.4	164	1855
	Australian shepherd (AUSS)	84138551.5	162	1857
	Australian kelpie (KELP)	101537995	160	1859
	Border collie (BORD)	101721388	160	1859
	Bearded collie (BERD)	110846366	159	1860
	Shetland sheepdog (SSHP)	148377751	155	1864
	Collie (COLL)	231462335	145	1874
	Pembroke welsh corgi (PEMB)	423121210	123	1896
Collie (COLL)	German shepherd dog (GSD)	29791279.8	168	1851
	Australian kelpie (KELP)	99314457.2	160	1859
	Patagonian sheepdog (PGOD)	113755055	159	1860
	old English sheepdog (OES)	115023893	159	1860
	Border collie (BORD)	172357122	152	1867
	Bearded collie (BERD)	229517653	146	1873
	Cardigan welsh corgi (CARD)	231462335	145	1874
	Pembroke welsh corgi (PEMB)	306736854	137	1882
	Australian shepherd (AUSS)	324778418	135	1884
	Shetland sheepdog (SSHP)	1443089611	7	2012
German shepherd dog (GSD)	old English sheepdog (OES)	9260166.83	171	1848
	Bearded collie (BERD)	11613091.3	170	1849
	Cardigan welsh corgi (CARD)	15987253.2	170	1849
	Australian kelpie (KELP)	16488467.6	170	1849
	Pembroke welsh corgi (PEMB)	17336963.3	170	1849
	Shetland sheepdog (SSHP)	20608982.3	169	1850
	Patagonian sheepdog (PGOD)	24819692.1	169	1850
	Collie (COLL)	29791279.8	168	1851
	Border collie (BORD)	34355516.8	168	1851
	Australian shepherd (AUSS)	71031907.8	164	1855
Australian kelpie (KELP)	German shepherd dog (GSD)	16488467.6	170	1849
	old English sheepdog (OES)	63346862.6	165	1854
	Australian shepherd (AUSS)	71613291.1	164	1855
	Pembroke welsh corgi (PEMB)	86065272.8	162	1857
	Shetland sheepdog (SSHP)	89617908.3	162	1857
	Collie (COLL)	99314457.2	160	1859
	Cardigan welsh corgi (CARD)	101537995	160	1859
	Bearded collie (BERD)	141368975	156	1863
	Patagonian sheepdog (PGOD)	168859209	152	1867
	Border collie (BORD)	334087512	134	1885
old English sheepdog (OES)	German shepherd dog (GSD)	9260166.83	171	1848
	Cardigan welsh corgi (CARD)	47374361.5	166	1853
	Australian shepherd (AUSS)	53159135.3	166	1853
	Pembroke welsh corgi (PEMB)	54776766.3	166	1853
	Australian kelpie (KELP)	63346862.6	165	1854
	Patagonian sheepdog (PGOD)	83416732	162	1857
	Border collie (BORD)	87007506.8	162	1857
	Shetland sheepdog (SSHP)	103271893	160	1859
	Collie (COLL)	115023893	159	1860
	Bearded collie (BERD)	138775523	156	1863
Pembroke welsh corgi (PEMB)	German shepherd dog (GSD)	17336963.3	170	1849
	old English sheepdog (OES)	54776766.3	166	1853
	Patagonian sheepdog (PGOD)	61405006.4	165	1854
	Australian shepherd (AUSS)	85288294.1	162	1857
	Australian kelpie (KELP)	86065272.8	162	1857
	Border collie (BORD)	102678499	160	1859
	Bearded collie (BERD)	110720177	159	1860
	Shetland sheepdog (SSHP)	208273306	148	1871
	Collie (COLL)	306736854	137	1882
	Cardigan welsh corgi (CARD)	423121210	123	1896
Patagonian sheepdog (PGOD)	German shepherd dog (GSD)	24819692.1	169	1850
	Australian shepherd (AUSS)	56931939.3	165	1854
	Pembroke welsh corgi (PEMB)	61405006.4	165	1854
	Cardigan welsh corgi (CARD)	70724179.4	164	1855
	old English sheepdog (OES)	83416732	162	1857
	Shetland sheepdog (SSHP)	105123281	160	1859
	Collie (COLL)	113755055	159	1860
	Bearded collie (BERD)	138772292	156	1863
	Australian kelpie (KELP)	168859209	152	1867
	Border collie (BORD)	199211871	149	1870
Shetland sheepdog (SSHP)	German shepherd dog (GSD)	20608982.3	169	1850
	Australian kelpie (KELP)	89617908.3	162	1857
	old English sheepdog (OES)	103271893	160	1859
	Patagonian sheepdog (PGOD)	105123281	160	1859
	Border collie (BORD)	137763291	156	1863
	Cardigan welsh corgi (CARD)	148377751	155	1864
	Bearded collie (BERD)	158356573	154	1865
	Australian shepherd (AUSS)	185941011	151	1868
	Pembroke welsh corgi (PEMB)	208273306	148	1871
	Collie (COLL)	1443089611	7	2012
